# Supplementary material for: "Just Culture" From the Perspective of Nursing Personnel
Source: Preprints.org preprint supplement (doi:10.20944/preprints202003.0384.v1), 2020-03-26
Supplement: Supplementary file 1 [file supplementary]

**„Just culture” from the perspective of nursing personnel**

**Małgorzata Z. Wiśniewska,**

Profesor Małgorzata Z. Wiśniewska, University of Gdansk/Faculty of Management; [malgorzata.wisniewska@ug.edu.pl](mailto:malgorzata.wisniewska@ug.edu.pl); 101Armii Krajowej Street; 81-824 Sopot; Poland

**Piotr Grudowski (corresponding author),**

Professor Piotr Grudowski, Gdansk University of Technology/Faculty of Management and Economics; [pgrudows@pg.edu.pl](mailto:pgrudows@pg.edu.pl) ; 11/12 Gabriela Narutowicza Street; 80-233 Gdańsk; Poland

**Ewa Marjańska**

Doctor (PhD) Ewa Marjańska, Gdańsk University of Technology/Faculty of Management and Economics; [ewam@zie.pg.gda.pl](mailto:ewam@zie.pg.gda.pl); 11/12 Gabriela Narutowicza Street; 80-233 Gdańsk; Poland
